# Supplementary material for: Persistent impairments 3 years after (neo)adjuvant chemotherapy for breast cancer: results from the MaTox project
Source: Springer Nature journal article supplement (doi:10.1007/s10549-017-4365-7), 2017-07-04

Figure S1 - PRO for the first questionnaire according to the fill-in date

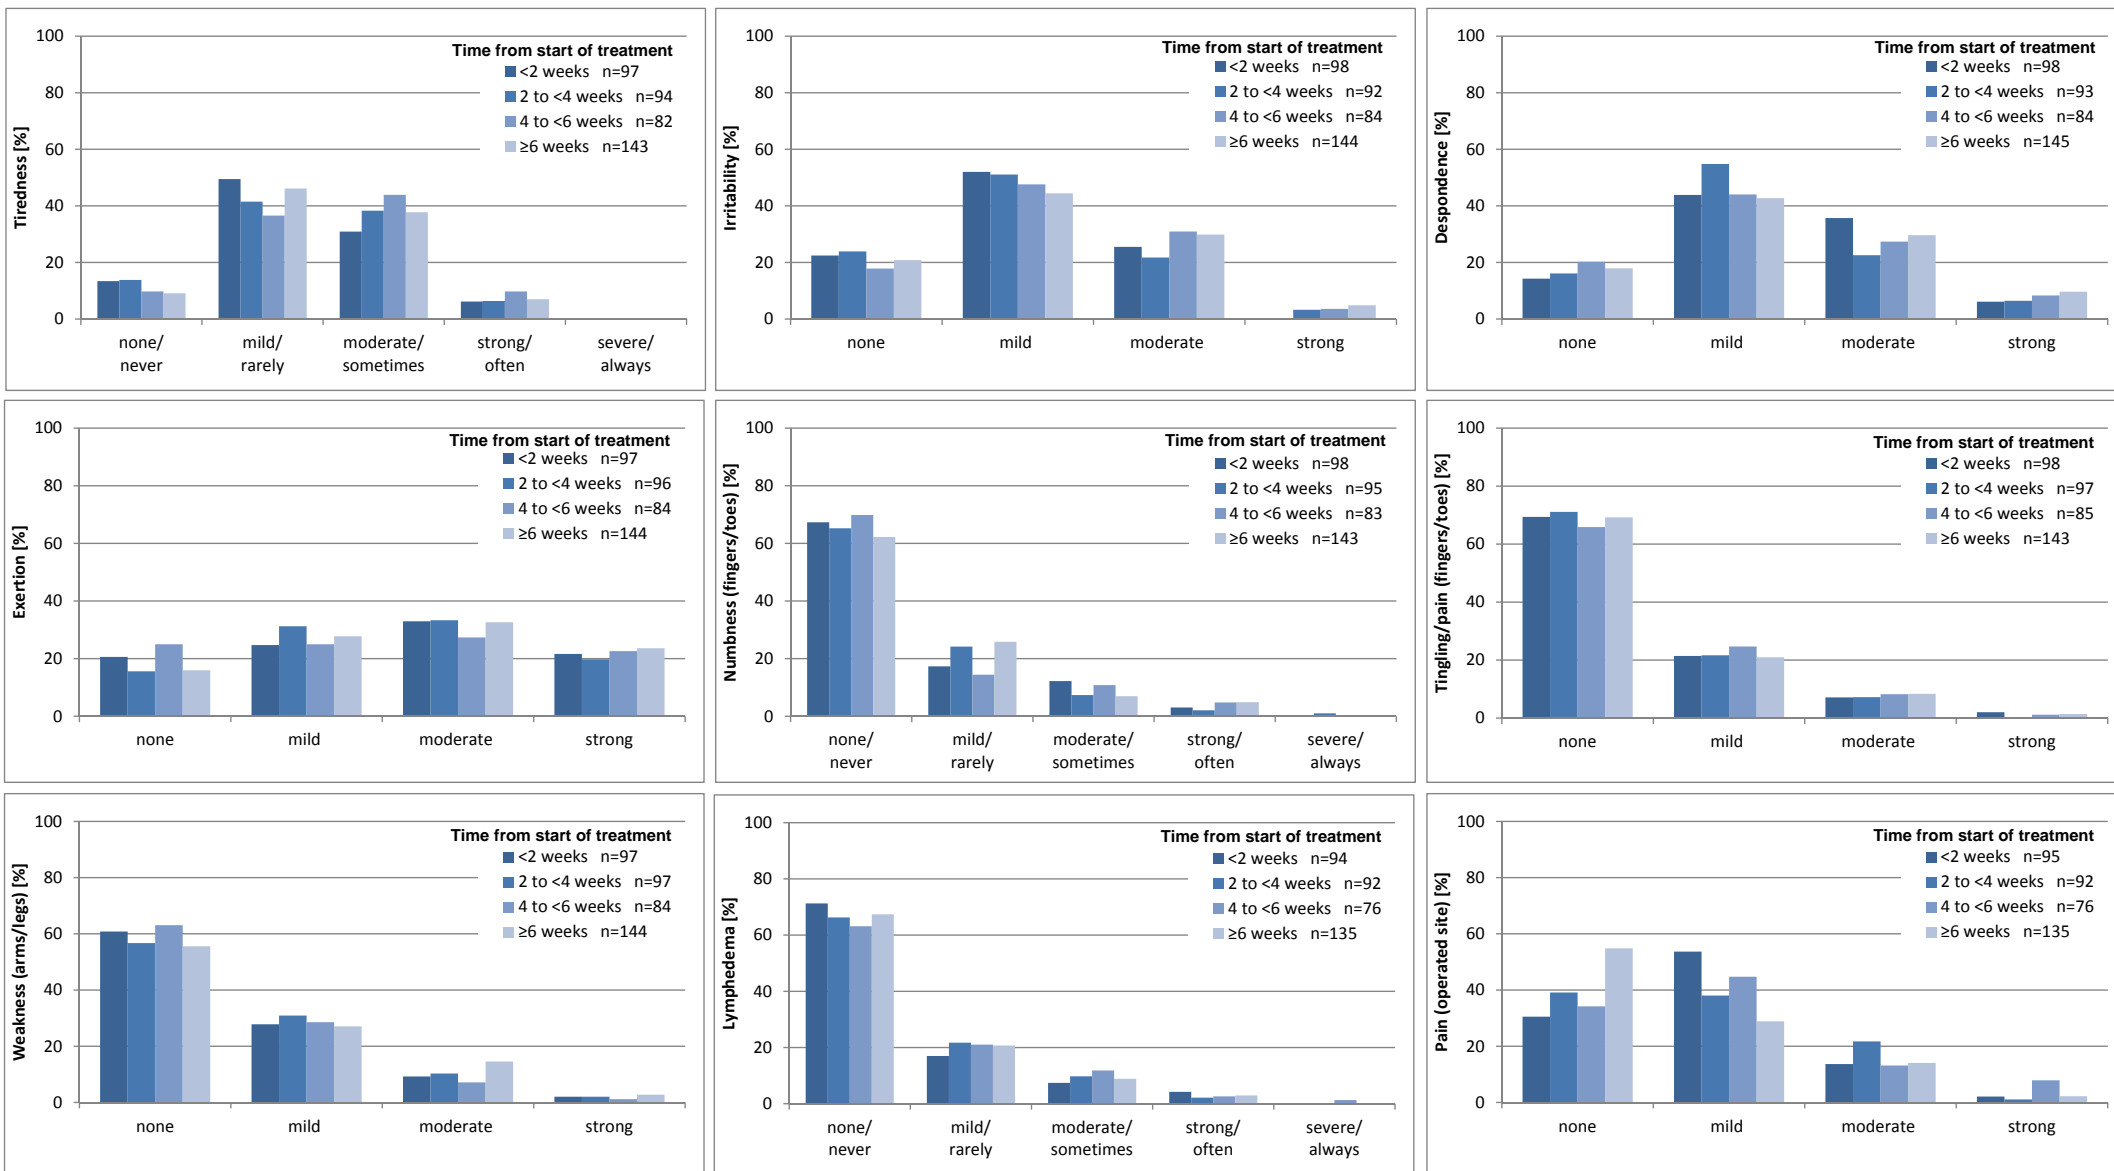

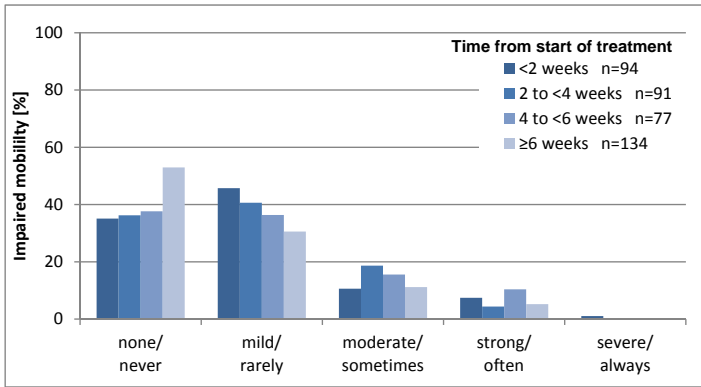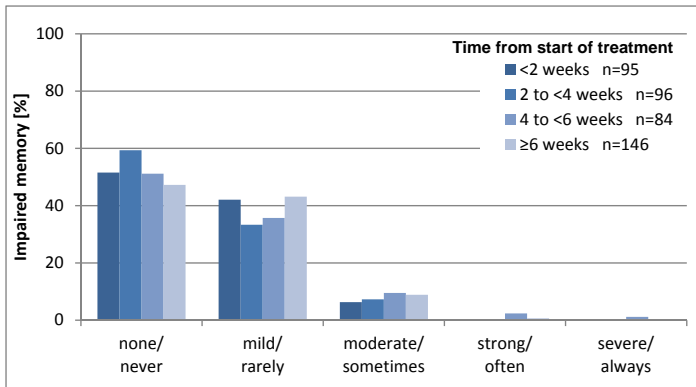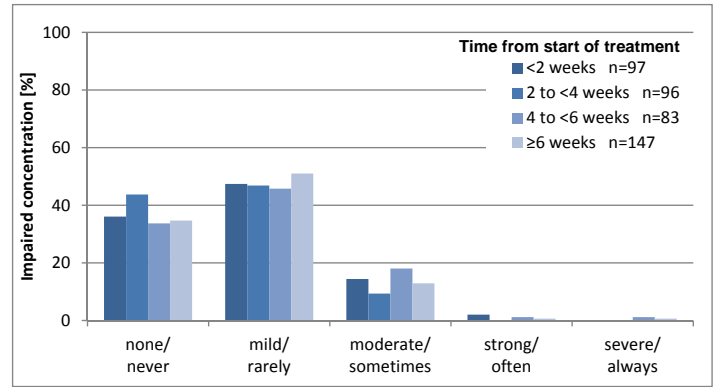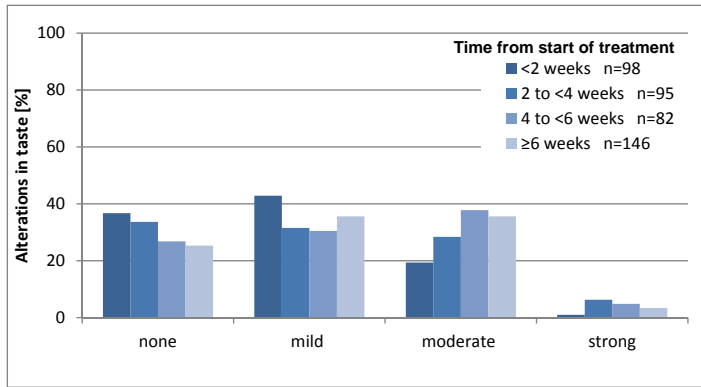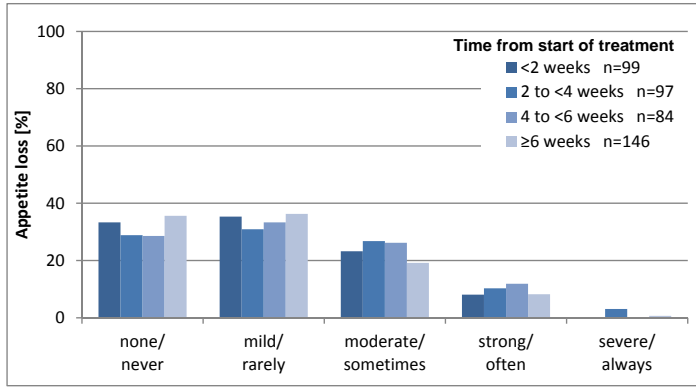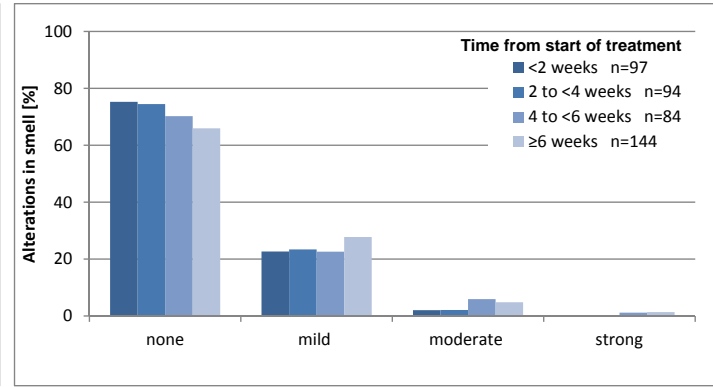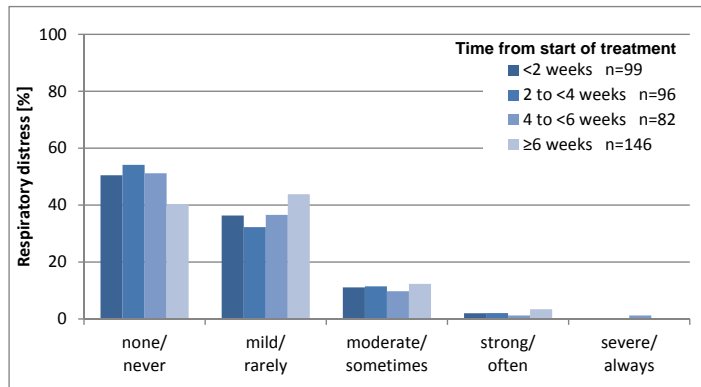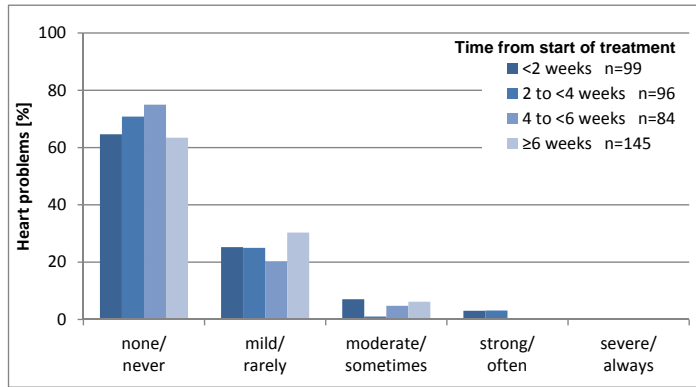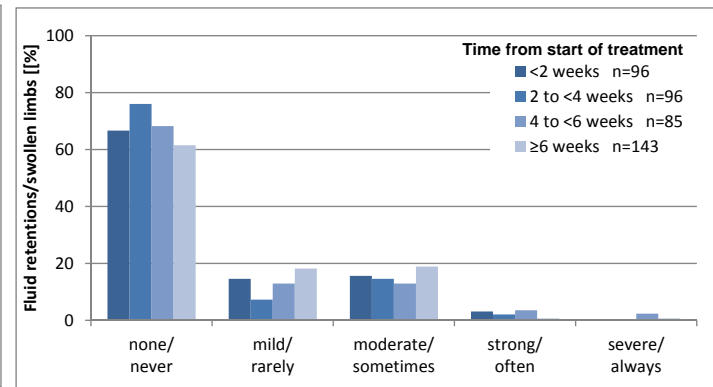

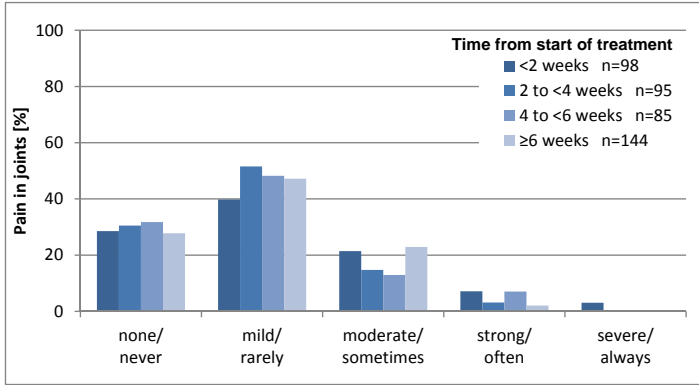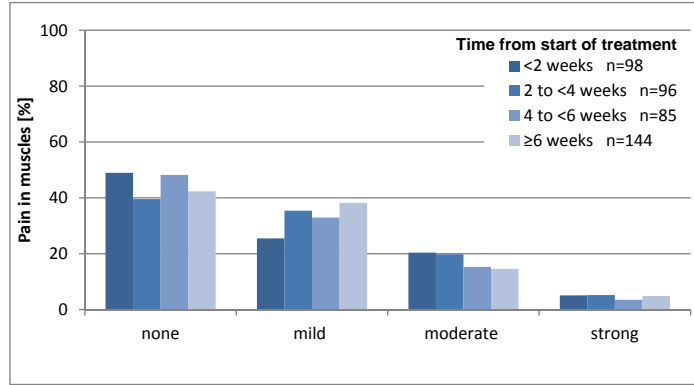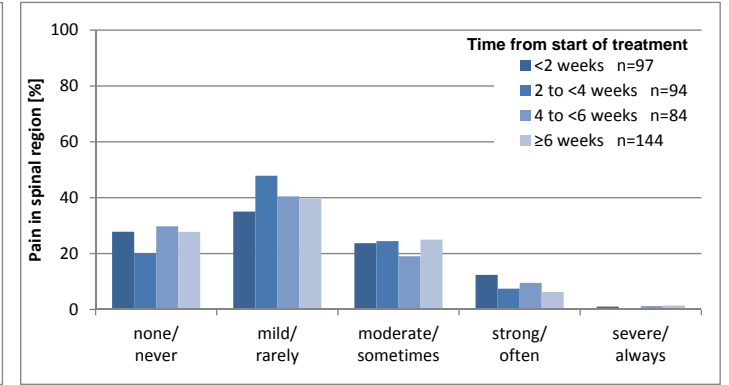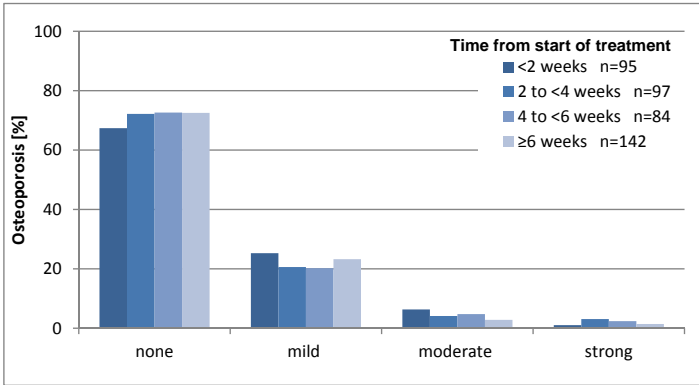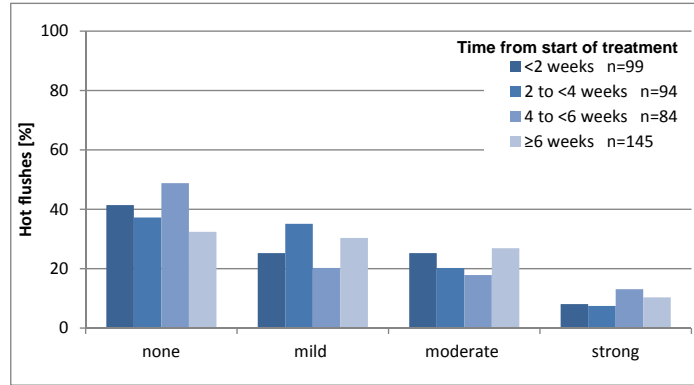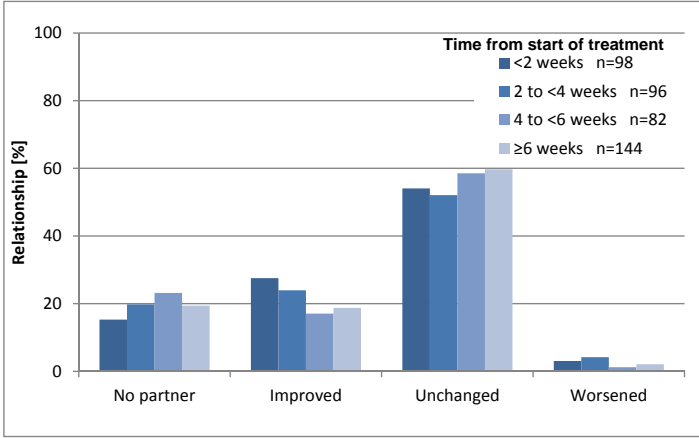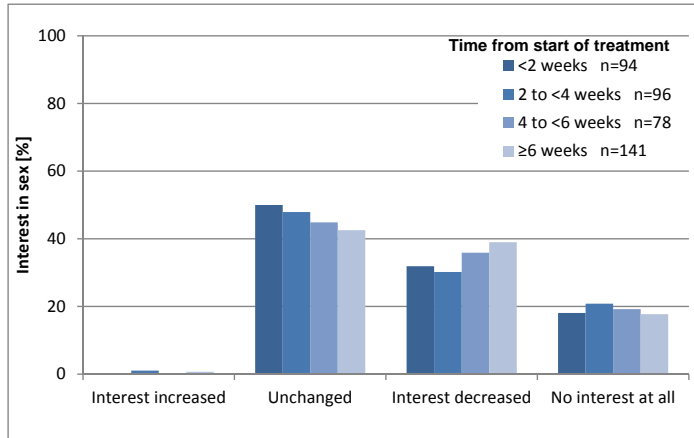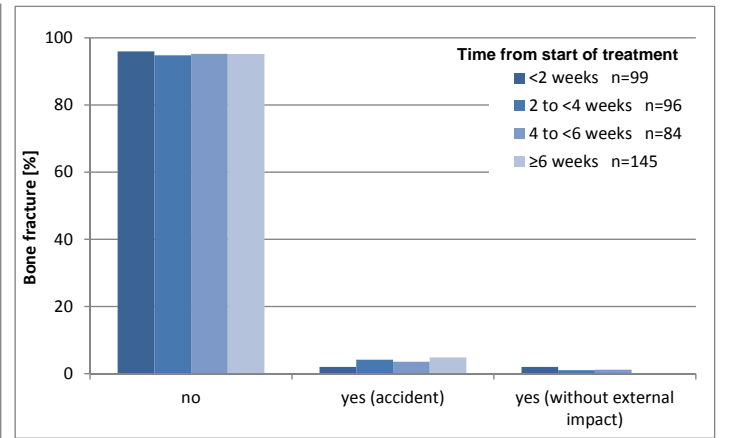

Supplement: MOESM1 [file 13274662]
