# Supplementary material for: Persistent impairments 3 years after (neo)adjuvant chemotherapy for breast cancer: results from the MaTox project
Source: PubMed Central journal article supplement (PMC5602000; doi:10.1007/s10549-017-4365-7), 2017-07-05
Supplement: 10549_2017_4365_MOESM2_ESM.pdf [file 10549_2017_4365_MOESM2_ESM.pdf]

**Table S1. Results of the patient reported outcomes – all timepoints**

| Item                                  | 4 weeks |      | 6 months |      | 18 months |      | 3 years |      |
|---------------------------------------|---------|------|----------|------|-----------|------|---------|------|
|                                       | n       | %    | n        | %    | n         | %    | n       | %    |
| <b><u>General condition</u></b>       |         |      |          |      |           |      |         |      |
| <b>Tiredness</b>                      | 416     | -    | 398      | -    | 376       | -    | 332     | -    |
| None / never                          | 47      | 11.3 | 50       | 12.6 | 63        | 16.8 | 47      | 14.2 |
| Mild / rarely                         | 183     | 44.0 | 182      | 45.7 | 192       | 51.1 | 182     | 54.8 |
| Moderate / sometimes                  | 156     | 37.5 | 139      | 34.9 | 111       | 29.5 | 92      | 27.7 |
| Strong / often                        | 30      | 7.2  | 27       | 6.8  | 10        | 2.7  | 10      | 3.0  |
| Severe / always                       | 0       | -    | 0        | -    | 0         | -    | 1       | 0.3  |
| <b>Irritability</b>                   | 418     | -    | 401      | -    | 376       | -    | 334     | -    |
| None                                  | 89      | 21.3 | 68       | 17.0 | 65        | 17.3 | 53      | 15.9 |
| Mild                                  | 202     | 48.3 | 196      | 48.9 | 189       | 50.3 | 174     | 52.1 |
| Moderate                              | 114     | 27.3 | 114      | 28.4 | 107       | 28.5 | 92      | 27.5 |
| Strong                                | 13      | 3.1  | 23       | 5.7  | 15        | 4.0  | 15      | 4.5  |
| <b>Despondence</b>                    | 420     | -    | 402      | -    | 375       | -    | 333     | -    |
| None                                  | 72      | 17.1 | 93       | 23.1 | 85        | 22.7 | 81      | 24.3 |
| Mild                                  | 193     | 46.0 | 164      | 40.8 | 159       | 42.4 | 145     | 43.5 |
| Moderate                              | 122     | 29.0 | 120      | 29.9 | 117       | 31.2 | 92      | 27.6 |
| Strong                                | 33      | 7.9  | 25       | 6.2  | 14        | 3.7  | 15      | 4.5  |
| <b>Exertion</b>                       | 421     | -    | 399      | -    | 377       | -    | 332     | -    |
| None                                  | 79      | 18.8 | 56       | 14.0 | 85        | 22.5 | 62      | 18.7 |
| Mild                                  | 115     | 27.3 | 98       | 24.6 | 104       | 27.6 | 99      | 29.8 |
| Moderate                              | 134     | 31.8 | 136      | 34.1 | 120       | 31.8 | 98      | 29.5 |
| Strong                                | 93      | 22.1 | 109      | 27.3 | 68        | 18.0 | 73      | 22.0 |
| <b><u>Polyneuropathy symptoms</u></b> |         |      |          |      |           |      |         |      |
| <b>Numbness (fingers/toes)</b>        | 419     | -    | 397      | -    | 377       | -    | 330     | -    |
| None / never                          | 275     | 65.6 | 147      | 37.0 | 168       | 44.6 | 133     | 40.3 |
| Mild / rarely                         | 89      | 21.2 | 111      | 28.0 | 88        | 23.3 | 101     | 30.6 |
| Moderate / sometimes                  | 38      | 9.1  | 85       | 21.4 | 80        | 21.2 | 66      | 20.0 |
| Strong / often                        | 16      | 3.8  | 42       | 10.6 | 35        | 9.3  | 21      | 6.4  |
| Severe / always                       | 1       | 0.2  | 12       | 3.0  | 6         | 1.6  | 9       | 2.7  |
| <b>Tingling / pain (fingers/toes)</b> | 423     | -    | 397      | -    | 371       | -    | 331     | -    |
| None                                  | 292     | 69.0 | 161      | 40.6 | 162       | 43.7 | 142     | 42.9 |
| Mild                                  | 93      | 22.0 | 109      | 27.5 | 99        | 26.7 | 108     | 32.6 |
| Moderate                              | 33      | 7.8  | 94       | 23.7 | 94        | 25.3 | 65      | 19.6 |
| Strong                                | 5       | 1.2  | 33       | 8.3  | 16        | 4.3  | 16      | 4.8  |
| <b>Weakness (arms/legs)</b>           | 422     | -    | 395      | -    | 376       | -    | 332     | -    |
| None                                  | 247     | 58.5 | 183      | 46.3 | 180       | 47.9 | 162     | 48.8 |
| Mild                                  | 120     | 28.4 | 113      | 28.6 | 121       | 32.2 | 107     | 32.2 |
| Moderate                              | 46      | 10.9 | 81       | 20.5 | 60        | 16.0 | 52      | 15.7 |
| Strong                                | 9       | 2.1  | 18       | 4.6  | 15        | 4.0  | 11      | 3.3  |

|                                        |     |      |     |      |     |      |     |      |
|----------------------------------------|-----|------|-----|------|-----|------|-----|------|
| <b><u>Post-surgical symptoms</u></b>   |     |      |     |      |     |      |     |      |
| <b>Lymphedema</b>                      | 397 | -    | 400 | -    | 376 | -    | 334 | -    |
| None / never                           | 267 | 67.3 | 226 | 56.5 | 201 | 53.5 | 177 | 53.0 |
| Mild / rarely                          | 80  | 20.2 | 104 | 26.0 | 90  | 23.9 | 91  | 27.2 |
| Moderate / sometimes                   | 37  | 9.3  | 43  | 10.8 | 54  | 14.4 | 42  | 12.6 |
| Strong / often                         | 12  | 3.0  | 25  | 6.3  | 27  | 7.2  | 21  | 6.3  |
| Severe / always                        | 1   | 0.3  | 2   | 0.5  | 4   | 1.1  | 3   | 0.9  |
| <b>Pain (operated site)</b>            | 398 | -    | 397 | -    | 379 | -    | 331 | -    |
| None                                   | 165 | 41.5 | 106 | 26.7 | 110 | 29.0 | 110 | 33.2 |
| Mild                                   | 159 | 40.0 | 168 | 42.3 | 150 | 39.6 | 134 | 40.5 |
| Moderate                               | 62  | 15.6 | 105 | 26.4 | 103 | 27.2 | 74  | 22.4 |
| Strong                                 | 12  | 3.0  | 18  | 4.5  | 16  | 4.2  | 13  | 3.9  |
| <b>Impaired mobility</b>               | 396 | -    | 398 | -    | 374 | -    | 334 | -    |
| None / never                           | 166 | 41.9 | 127 | 31.9 | 132 | 35.3 | 136 | 40.7 |
| Mild / rarely                          | 149 | 37.6 | 154 | 38.7 | 140 | 37.4 | 122 | 36.5 |
| Moderate / sometimes                   | 54  | 13.6 | 84  | 21.1 | 64  | 17.1 | 57  | 17.1 |
| Strong / often                         | 26  | 6.6  | 31  | 7.8  | 37  | 9.9  | 16  | 4.8  |
| Severe / always                        | 1   | 0.3  | 2   | 0.5  | 1   | 0.3  | 3   | 0.9  |
| <b><u>Memory / attention</u></b>       |     |      |     |      |     |      |     |      |
| <b>Impaired memory</b>                 | 421 | -    | 402 | -    | 380 | -    | 333 | -    |
| None / never                           | 218 | 51.8 | 113 | 28.1 | 105 | 27.6 | 74  | 22.2 |
| Mild / rarely                          | 165 | 39.2 | 205 | 51.0 | 197 | 51.8 | 201 | 60.4 |
| Moderate / sometimes                   | 34  | 8.1  | 72  | 17.9 | 66  | 17.4 | 51  | 15.3 |
| Strong / often                         | 3   | 0.7  | 12  | 3.0  | 11  | 2.9  | 6   | 1.8  |
| Severe / always                        | 1   | 0.2  | 0   | -    | 1   | 0.3  | 1   | 0.3  |
| <b>Impaired concentration</b>          | 423 | -    | 398 | -    | 378 | -    | 333 | -    |
| None / never                           | 156 | 36.9 | 113 | 28.4 | 98  | 25.9 | 76  | 22.8 |
| Mild / rarely                          | 204 | 48.2 | 200 | 50.3 | 204 | 54.0 | 194 | 58.3 |
| Moderate / sometimes                   | 57  | 13.5 | 76  | 19.1 | 63  | 16.7 | 50  | 15.0 |
| Strong / often                         | 4   | 0.9  | 9   | 2.3  | 13  | 3.4  | 13  | 3.9  |
| Severe / always                        | 2   | 0.5  | 0   | -    | 0   | -    | 0   | -    |
| <b><u>Appetite / smell / taste</u></b> |     |      |     |      |     |      |     |      |
| <b>Alterations in taste</b>            | 421 | -    | 383 | -    | 366 | -    | 333 | -    |
| None                                   | 127 | 30.2 | 185 | 48.3 | 252 | 68.9 | 248 | 74.5 |
| Mild                                   | 149 | 35.4 | 103 | 26.9 | 73  | 19.9 | 56  | 16.8 |
| Moderate                               | 129 | 30.6 | 82  | 21.4 | 35  | 9.6  | 28  | 8.4  |
| Strong                                 | 16  | 3.8  | 13  | 3.4  | 6   | 1.6  | 1   | 0.3  |
| <b>Appetite loss</b>                   | 426 | -    | 399 | -    | 375 | -    | 330 | -    |
| None / never                           | 137 | 32.2 | 215 | 53.9 | 256 | 68.3 | 221 | 67.0 |
| Mild / rarely                          | 146 | 34.3 | 98  | 24.6 | 78  | 20.8 | 70  | 21.2 |
| Moderate / sometimes                   | 99  | 23.2 | 57  | 14.3 | 30  | 8.0  | 35  | 10.6 |
| Strong / often                         | 40  | 9.4  | 27  | 6.8  | 10  | 2.7  | 3   | 0.9  |
| Severe / always                        | 4   | 0.9  | 2   | 0.5  | 1   | 0.3  | 1   | 0.3  |

|                                       |     |      |     |      |     |      |     |      |
|---------------------------------------|-----|------|-----|------|-----|------|-----|------|
| <b>Alterations in smell</b>           | 419 | -    | 399 | -    | 373 | -    | 330 | -    |
| None                                  | 297 | 70.9 | 281 | 70.4 | 294 | 78.8 | 260 | 78.8 |
| Mild                                  | 103 | 24.6 | 95  | 23.8 | 63  | 16.9 | 58  | 17.6 |
| Moderate                              | 16  | 3.8  | 19  | 4.8  | 10  | 2.7  | 10  | 3.0  |
| Strong                                | 3   | 0.7  | 4   | 1.0  | 6   | 1.6  | 2   | 0.6  |
| <hr/>                                 |     |      |     |      |     |      |     |      |
| <b><u>Cardiac function</u></b>        |     |      |     |      |     |      |     |      |
| <b>Respiratory distress</b>           | 423 | -    | 397 | -    | 374 | -    | 331 | -    |
| None / never                          | 203 | 48.0 | 138 | 34.8 | 145 | 38.8 | 119 | 36.0 |
| Mild / rarely                         | 161 | 38.1 | 165 | 41.6 | 156 | 41.7 | 138 | 41.7 |
| Moderate / sometimes                  | 48  | 11.3 | 79  | 19.9 | 60  | 16.0 | 62  | 18.7 |
| Strong / often                        | 10  | 2.4  | 14  | 3.5  | 11  | 2.9  | 12  | 3.6  |
| Severe / always                       | 1   | 0.2  | 1   | 0.3  | 2   | 0.5  | 0   | -    |
| <b>Heart problems</b>                 | 424 | -    | 398 | -    | 371 | -    | 332 | -    |
| None / never                          | 287 | 67.7 | 246 | 61.8 | 240 | 64.7 | 207 | 62.3 |
| Mild / rarely                         | 110 | 25.9 | 116 | 29.1 | 100 | 27.0 | 97  | 29.2 |
| Moderate / sometimes                  | 21  | 5.0  | 31  | 7.8  | 22  | 5.9  | 24  | 7.2  |
| Strong / often                        | 6   | 1.4  | 5   | 1.3  | 9   | 2.4  | 4   | 1.2  |
| Severe / always                       | 0   | -    | 0   | -    | 0   | -    | 0   | -    |
| <b>Fluid retentions/swollen limbs</b> | 420 | -    | 398 | -    | 372 | -    | 326 | -    |
| None / never                          | 283 | 67.4 | 208 | 52.3 | 184 | 49.5 | 154 | 47.2 |
| Mild / rarely                         | 58  | 13.8 | 78  | 19.6 | 78  | 21.0 | 82  | 25.2 |
| Moderate / sometimes                  | 67  | 16.0 | 79  | 19.8 | 80  | 21.5 | 70  | 21.5 |
| Strong / often                        | 9   | 2.1  | 26  | 6.5  | 26  | 7.0  | 16  | 4.9  |
| Severe / always                       | 3   | 0.7  | 7   | 1.8  | 4   | 1.1  | 4   | 1.2  |
| <hr/>                                 |     |      |     |      |     |      |     |      |
| <b><u>Musculoskeletal system</u></b>  |     |      |     |      |     |      |     |      |
| <b>Pain joints</b>                    | 422 | -    | 398 | -    | 373 | -    | 330 | -    |
| None / never                          | 124 | 29.4 | 70  | 17.6 | 46  | 12.3 | 35  | 10.6 |
| Mild / rarely                         | 197 | 46.7 | 163 | 41.0 | 159 | 42.6 | 142 | 43.0 |
| Moderate / sometimes                  | 79  | 18.7 | 112 | 28.1 | 106 | 28.4 | 97  | 29.4 |
| Strong / often                        | 19  | 4.5  | 50  | 12.6 | 50  | 13.4 | 51  | 15.5 |
| Severe / always                       | 3   | 0.7  | 3   | 0.8  | 12  | 3.2  | 5   | 1.5  |
| <b>Pain muscles</b>                   | 423 | -    | 396 | -    | 371 | -    | 330 | -    |
| None                                  | 188 | 44.4 | 120 | 30.3 | 91  | 24.5 | 90  | 27.3 |
| Mild                                  | 142 | 33.6 | 123 | 31.1 | 130 | 35.0 | 119 | 36.1 |
| Moderate                              | 73  | 17.3 | 124 | 31.3 | 122 | 32.9 | 96  | 29.1 |
| Strong                                | 20  | 4.7  | 29  | 7.3  | 28  | 7.5  | 25  | 7.6  |
| <b>Pain spinal region</b>             | 419 | -    | 396 | -    | 376 | -    | 333 | -    |
| None / never                          | 111 | 26.5 | 87  | 22.0 | 71  | 18.9 | 54  | 16.2 |
| Mild / rarely                         | 170 | 40.6 | 169 | 42.7 | 173 | 46.0 | 145 | 43.5 |
| Moderate / sometimes                  | 98  | 23.4 | 93  | 23.5 | 84  | 22.3 | 95  | 28.5 |
| Strong / often                        | 36  | 8.6  | 43  | 10.9 | 42  | 11.2 | 35  | 10.5 |
| Severe / always                       | 4   | 1.0  | 4   | 1.0  | 6   | 1.6  | 4   | 1.2  |

|                                        |     |      |     |      |     |      |     |      |
|----------------------------------------|-----|------|-----|------|-----|------|-----|------|
| <b><u>Hormone-related symptoms</u></b> |     |      |     |      |     |      |     |      |
| <b>Osteoporosis</b>                    | 418 | -    | 387 | -    | 371 | -    | 331 | -    |
| None                                   | 298 | 71.3 | 246 | 63.6 | 215 | 58.0 | 180 | 54.4 |
| Mild                                   | 94  | 22.5 | 108 | 27.9 | 109 | 29.4 | 95  | 28.7 |
| Moderate                               | 18  | 4.3  | 27  | 7.0  | 38  | 10.2 | 46  | 13.9 |
| Strong                                 | 8   | 1.9  | 6   | 1.6  | 9   | 2.4  | 10  | 3.0  |
| <b>Bone fracture</b>                   | 424 | -    | 392 | -    | 377 | -    | 335 | -    |
| No                                     | 404 | 95.3 | 389 | 99.2 | 355 | 94.2 | 315 | 94.0 |
| Yes (accident)                         | 16  | 3.8  | 2   | 0.5  | 16  | 4.2  | 17  | 5.1  |
| Yes (without external impact)          | 4   | 0.9  | 1   | 0.3  | 6   | 1.6  | 3   | 0.9  |
| <b>Hot flushes</b>                     | 422 | -    | 398 | -    | 376 | -    | 333 | -    |
| None                                   | 164 | 38.9 | 116 | 29.1 | 83  | 22.1 | 67  | 20.1 |
| Mild                                   | 119 | 28.2 | 107 | 26.9 | 111 | 29.5 | 91  | 27.3 |
| Moderate                               | 98  | 23.2 | 103 | 25.9 | 117 | 31.1 | 115 | 34.5 |
| Strong                                 | 41  | 9.7  | 72  | 18.1 | 65  | 17.3 | 60  | 18.0 |
| <hr/>                                  |     |      |     |      |     |      |     |      |
| <b><u>Relationship</u></b>             |     |      |     |      |     |      |     |      |
| <b>Relationship</b>                    | 420 | -    | 391 | -    | 379 | -    | 333 | -    |
| No partner                             | 81  | 19.3 | 73  | 18.7 | 74  | 19.5 | 73  | 21.9 |
| Improved                               | 91  | 21.7 | 66  | 16.9 | 42  | 11.1 | 38  | 11.4 |
| Unchanged                              | 237 | 56.4 | 225 | 57.5 | 230 | 60.7 | 186 | 55.9 |
| Worsened                               | 11  | 2.6  | 27  | 6.9  | 33  | 8.7  | 36  | 10.8 |
| <b>Interest in sex</b>                 | 409 | -    | 383 | -    | 366 | -    | 324 | -    |
| Interest increased                     | 2   | 0.5  | 6   | 1.6  | 7   | 1.9  | 5   | 1.5  |
| Unchanged                              | 188 | 46.0 | 145 | 37.9 | 148 | 40.4 | 112 | 34.6 |
| Interest decreased                     | 142 | 34.7 | 144 | 37.6 | 131 | 35.8 | 113 | 34.9 |
| No interest at all                     | 77  | 18.8 | 88  | 23.0 | 80  | 21.9 | 94  | 29.0 |
