# Supplementary material for: Persistent impairments 3 years after (neo)adjuvant chemotherapy for breast cancer: results from the MaTox project
Source: Springer Nature journal article supplement (doi:10.1007/s10549-017-4365-7), 2017-07-04
Supplement: MOESM3 [file 13274662]

**Table S2. Patient and tumour characteristics – 3-year questionnaire yes/no**

| 3-year questionnaire available                       | Yes<br>(n=336) |         | No<br>(n=117) |         |
|------------------------------------------------------|----------------|---------|---------------|---------|
|                                                      | Median         | Min-Max | Median        | Min-Max |
| Age at diagnosis (years)                             | 57             | 30-79   | 54            | 32-74   |
|                                                      | Mean           | StD     | Mean          | StD     |
| BMI at enrolment                                     | 26.7           | 5.0     | 25.8          | 5.0     |
| Patients with comorbidity <sup>a</sup>               | n              | %       | n             | %       |
| Any comorbidity <sup>b</sup>                         | 181            | 53.9    | 73            | 62.4    |
| CCI =0 <sup>c</sup>                                  | 273            | 81.3    | 81            | 69.2    |
| CCI ≥1 <sup>c</sup>                                  | 63             | 18.8    | 36            | 30.8    |
| Hypertension                                         | 99             | 29.5    | 31            | 26.5    |
| Diabetes                                             | 23             | 6.8     | 13            | 11.1    |
| Menopausal status <sup>d</sup>                       |                |         |               |         |
| Premenopausal                                        | 89             | 26.5    | 38            | 32.5    |
| Perimenopausal                                       | 16             | 4.8     | 2             | 1.7     |
| Postmenopausal                                       | 199            | 59.2    | 61            | 52.1    |
| Unknown                                              | 32             | 9.5     | 16            | 13.7    |
| Receptor status <sup>a</sup>                         |                |         |               |         |
| HR-positive, HER2-negative                           | 181            | 53.9    | 56            | 47.9    |
| HR-positive, HER2-positive                           | 60             | 17.9    | 16            | 13.7    |
| HR-negative, HER2-positive                           | 31             | 9.2     | 7             | 6.0     |
| Triple negative                                      | 54             | 16.1    | 32            | 27.4    |
| Unknown                                              | 10             | 3.0     | 6             | 5.1     |
| Tumour stage <sup>a, e</sup>                         |                |         |               |         |
| I                                                    | 92             | 27.4    | 26            | 22.2    |
| II                                                   | 151            | 44.9    | 50            | 42.7    |
| III                                                  | 49             | 14.6    | 22            | 18.8    |
| Not determined/Unknown <sup>f</sup>                  | 44             | 13.1    | 19            | 16.2    |
| Nodal stage <sup>a</sup>                             |                |         |               |         |
| Positive                                             | 162            | 48.2    | 60            | 51.3    |
| Negative (N0)                                        | 166            | 49.4    | 51            | 43.6    |
| Unknown (NX + missing)                               | 8              | 2.4     | 6             | 5.2     |
| Location of primary tumour <sup>a</sup>              |                |         |               |         |
| Right                                                | 163            | 48.5    | 69            | 59.0    |
| Left                                                 | 165            | 49.1    | 46            | 39.3    |
| Both                                                 | 8              | 2.4     | 2             | 1.7     |
| Resection of primary tumour                          |                |         |               |         |
| Breast-conserving<br>(incl. follow-up resection)     | 235            | 69.9    | 64            | 54.7    |
| Non-breast conserving<br>(mastectomy/ablatio mammae) | 88             | 26.2    | 42            | 35.9    |
| Unknown                                              | 13             | 3.9     | 11            | 9.4     |
| Radiotherapy received                                | 265            | 78.9    | 89            | 76.1    |

|                                    |     |      |    |      |
|------------------------------------|-----|------|----|------|
| Chemotherapy setting at enrolment* |     |      |    |      |
| Neoadjuvant                        | 29  | 8.6  | 29 | 24.8 |
| Adjuvant                           | 307 | 91.4 | 88 | 75.2 |
| Taxane-based chemotherapy          | 194 | 57.7 | 81 | 69.2 |
| Top chemotherapy regimen           |     |      |    |      |
| F+E/A+C±Tra                        | 120 | 35.8 | 31 | 26.5 |
| F+E/A+C+D±Tra                      | 73  | 21.7 | 29 | 24.8 |
| E/A+C+D±Tra                        | 38  | 11.3 | 23 | 19.6 |
| E/A+C+P±Tra                        | 33  | 9.9  | 16 | 13.7 |
| Car+D±Tra                          | 13  | 3.9  | 5  | 4.3  |
| Other                              | 59  | 17.6 | 12 | 10.3 |
| Endocrine therapy received         | 221 | 65.8 | 64 | 54.7 |
| Endocrine therapy                  |     |      |    |      |
| Aromatase inhibitors (AI) ±GnRH    | 94  | 28.0 | 26 | 22.2 |
| Anti-oestrogen (AE)                | 71  | 21.1 | 25 | 21.4 |
| Switch AI/AE                       | 54  | 16.1 | 13 | 11.1 |
| GnRH-analogue                      | 2   | 0.6  | -  | -    |

<sup>a</sup> at diagnosis

<sup>b</sup> comorbidity according to Charlson [17] or additional concomitant diseases

<sup>c</sup> Charlson Comorbidity Index (CCI) according to Quan [18]

<sup>d</sup> at enrolment

<sup>e</sup> Tumour stage according to AJCC/UICC 7<sup>th</sup> edition

<sup>f</sup> for some patients the exact stage could not be determined because of unknown parameters (TX, NX, MX)

\*Only patients who had received (neo)adjuvant chemotherapy were included in the present analysis, because the subgroup of patients who had received endocrine treatment only was too small for a meaningful analysis.

**Abbreviations:** AE, anti-oestrogen; AI, aromatase inhibitor; BMI, body mass index in kg/m<sup>2</sup>; C, cyclophosphamide; CCI, Charlson Comorbidity Index; Car, carboplatin; D, docetaxel; E/A, epirubicin/doxorubicin; F, fluorouracil; GnRH, gonadotropin-releasing hormone; HR, hormone receptor; HER2, human epidermal growth factor receptor 2; Max, maximum; Min, minimum; N, regional lymph node; P, paclitaxel; StD, standard deviation; Tra, trastuzumab.
