# Supplementary material for: Persistent impairments 3 years after (neo)adjuvant chemotherapy for breast cancer: results from the MaTox project
Source: Springer Nature journal article supplement (doi:10.1007/s10549-017-4365-7), 2017-07-04
Supplement: MOESM4 [file 13274662]

**Table S3 – Comparison PROs of the first questionnaire – 3-year questionnaire yes/no**

| Time point<br>3-year questionnaire available | 4 weeks |      | 4 weeks |      |
|----------------------------------------------|---------|------|---------|------|
|                                              | Yes     |      | No      |      |
|                                              | n       | %    | n       | %    |
| <b><u>General condition</u></b>              |         |      |         |      |
| <b>Tiredness</b>                             | 311     | -    | 105     | -    |
| None / never                                 | 31      | 10.0 | 16      | 15.2 |
| Mild / rarely                                | 140     | 45.0 | 43      | 41.0 |
| Moderate / sometimes                         | 117     | 37.6 | 39      | 37.1 |
| Strong / often                               | 23      | 7.4  | 7       | 6.7  |
| Severe / always                              | 0       | -    | 0       | -    |
| <b>Irritability</b>                          | 315     | -    | 103     | -    |
| None                                         | 71      | 22.5 | 18      | 17.5 |
| Mild                                         | 163     | 51.7 | 39      | 37.9 |
| Moderate                                     | 73      | 23.2 | 41      | 39.8 |
| Strong                                       | 8       | 2.5  | 5       | 4.9  |
| <b>Despondence</b>                           | 314     | -    | 106     | -    |
| None                                         | 56      | 17.8 | 16      | 15.1 |
| Mild                                         | 142     | 45.2 | 51      | 48.1 |
| Moderate                                     | 91      | 29.0 | 31      | 29.2 |
| Strong                                       | 25      | 8.0  | 8       | 7.5  |
| <b>Exertion</b>                              | 318     | -    | 103     | -    |
| None                                         | 60      | 18.9 | 19      | 18.4 |
| Mild                                         | 91      | 28.6 | 24      | 23.3 |
| Moderate                                     | 96      | 30.2 | 38      | 36.9 |
| Strong                                       | 71      | 22.3 | 22      | 21.4 |
| <b><u>Polyneuropathy symptoms</u></b>        |         |      |         |      |
| <b>Numbness (fingers/toes)</b>               | 313     | -    | 106     | -    |
| None / never                                 | 204     | 65.2 | 71      | 67.0 |
| Mild / rarely                                | 63      | 20.1 | 26      | 24.5 |
| Moderate / sometimes                         | 32      | 10.2 | 6       | 5.7  |
| Strong / often                               | 13      | 4.2  | 3       | 2.8  |
| Severe / always                              | 1       | 0.3  | 0       | -    |
| <b>Tingling / pain (fingers/toes)</b>        | 315     | -    | 108     | -    |
| None                                         | 219     | 69.5 | 73      | 67.6 |
| Mild                                         | 66      | 21.0 | 27      | 25.0 |
| Moderate                                     | 26      | 8.3  | 7       | 6.5  |
| Strong                                       | 4       | 1.3  | 1       | 0.9  |
| <b>Weakness (arms/legs)</b>                  | 316     | -    | 106     | -    |
| None                                         | 189     | 59.8 | 58      | 54.7 |
| Mild                                         | 86      | 27.2 | 34      | 32.1 |
| Moderate                                     | 34      | 10.8 | 12      | 11.3 |
| Strong                                       | 7       | 2.2  | 2       | 1.9  |

**Post-surgical symptoms**

|                                        |     |      |     |      |
|----------------------------------------|-----|------|-----|------|
| <b>Lymphedema</b>                      | 302 | -    | 95  | -    |
| None / never                           | 207 | 68.5 | 60  | 63.2 |
| Mild / rarely                          | 59  | 19.5 | 21  | 22.1 |
| Moderate / sometimes                   | 28  | 9.3  | 9   | 9.5  |
| Strong / often                         | 7   | 2.3  | 5   | 5.3  |
| Severe / always                        | 1   | 0.3  | 0   | -    |
| <b>Pain (operated site)</b>            | 304 | -    | 94  | -    |
| None                                   | 123 | 40.5 | 42  | 44.7 |
| Mild                                   | 123 | 40.5 | 36  | 38.3 |
| Moderate                               | 50  | 16.4 | 12  | 12.8 |
| Strong                                 | 8   | 2.6  | 4   | 4.3  |
| <b>Impaired mobility</b>               | 303 | -    | 93  | -    |
| None / never                           | 129 | 42.6 | 37  | 39.8 |
| Mild / rarely                          | 116 | 38.3 | 33  | 35.5 |
| Moderate / sometimes                   | 39  | 12.9 | 15  | 16.1 |
| Strong / often                         | 19  | 6.3  | 7   | 7.5  |
| Severe / always                        | 0   | -    | 1   | 1.1  |
| <b><u>Memory / attention</u></b>       |     |      |     |      |
| <b>Impaired memory</b>                 | 314 | -    | 107 | -    |
| None / never                           | 165 | 52.5 | 53  | 49.5 |
| Mild / rarely                          | 129 | 41.1 | 36  | 33.6 |
| Moderate / sometimes                   | 18  | 5.7  | 16  | 15.0 |
| Strong / often                         | 1   | 0.3  | 2   | 1.9  |
| Severe / always                        | 1   | 0.3  | 0   | -    |
| <b>Impaired concentration</b>          | 317 | -    | 106 | -    |
| None / never                           | 118 | 37.2 | 38  | 35.8 |
| Mild / rarely                          | 159 | 50.2 | 45  | 42.5 |
| Moderate / sometimes                   | 37  | 11.7 | 20  | 18.9 |
| Strong / often                         | 2   | 0.6  | 2   | 1.9  |
| Severe / always                        | 1   | 0.3  | 1   | 0.9  |
| <b><u>Appetite / smell / taste</u></b> |     |      |     |      |
| <b>Alterations in taste</b>            | 315 | -    | 106 | -    |
| None                                   | 92  | 29.2 | 35  | 33.0 |
| Mild                                   | 117 | 37.1 | 32  | 30.2 |
| Moderate                               | 93  | 29.5 | 36  | 34.0 |
| Strong                                 | 13  | 4.1  | 3   | 2.8  |
| <b>Appetite loss</b>                   | 317 | -    | 109 | -    |
| None / never                           | 105 | 33.1 | 32  | 29.4 |
| Mild / rarely                          | 105 | 33.1 | 41  | 37.6 |
| Moderate / sometimes                   | 72  | 22.7 | 27  | 24.8 |
| Strong / often                         | 32  | 10.1 | 8   | 7.3  |
| Severe / always                        | 3   | 0.9  | 1   | 0.9  |

|                                       |     |      |     |      |
|---------------------------------------|-----|------|-----|------|
| <b>Alterations in smell</b>           | 315 | -    | 104 | -    |
| None                                  | 219 | 69.5 | 78  | 75.0 |
| Mild                                  | 81  | 25.7 | 22  | 21.2 |
| Moderate                              | 13  | 4.1  | 3   | 2.9  |
| Strong                                | 2   | 0.6  | 1   | 1.0  |
| <b><u>Cardiac function</u></b>        |     |      |     |      |
| <b>Respiratory distress</b>           | 315 | -    | 108 | -    |
| None / never                          | 152 | 48.3 | 51  | 47.2 |
| Mild / rarely                         | 119 | 37.8 | 42  | 38.9 |
| Moderate / sometimes                  | 36  | 11.4 | 12  | 11.1 |
| Strong / often                        | 7   | 2.2  | 3   | 2.8  |
| Severe / always                       | 1   | 0.3  | 0   | -    |
| <b>Heart problems</b>                 | 317 | -    | 107 | -    |
| None / never                          | 216 | 68.1 | 71  | 66.4 |
| Mild / rarely                         | 82  | 25.9 | 28  | 26.2 |
| Moderate / sometimes                  | 16  | 5.0  | 5   | 4.7  |
| Strong / often                        | 3   | 0.9  | 3   | 2.8  |
| Severe / always                       | 0   | -    | 0   | -    |
| <b>Fluid retentions/swollen limbs</b> | 315 | -    | 105 | -    |
| None / never                          | 216 | 68.6 | 67  | 63.8 |
| Mild / rarely                         | 43  | 13.7 | 15  | 14.3 |
| Moderate / sometimes                  | 48  | 15.2 | 19  | 18.1 |
| Strong / often                        | 6   | 1.9  | 3   | 2.9  |
| Severe / always                       | 2   | 0.6  | 1   | 1.0  |
| <b><u>Musculoskeletal system</u></b>  |     |      |     |      |
| <b>Pain joints</b>                    | 315 | -    | 107 | -    |
| None / never                          | 93  | 29.5 | 31  | 29.0 |
| Mild / rarely                         | 146 | 46.3 | 51  | 47.7 |
| Moderate / sometimes                  | 60  | 19.0 | 19  | 17.8 |
| Strong / often                        | 13  | 4.1  | 6   | 5.6  |
| Severe / always                       | 3   | 1.0  | 0   | -    |
| <b>Pain muscles</b>                   | 315 | -    | 108 | -    |
| None                                  | 146 | 46.3 | 42  | 38.9 |
| Mild                                  | 105 | 33.3 | 37  | 34.3 |
| Moderate                              | 54  | 17.1 | 19  | 17.6 |
| Strong                                | 10  | 3.2  | 10  | 9.3  |
| <b>Pain spinal region</b>             | 315 | -    | 104 | -    |
| None / never                          | 80  | 25.4 | 31  | 29.8 |
| Mild / rarely                         | 134 | 42.5 | 36  | 34.6 |
| Moderate / sometimes                  | 71  | 22.5 | 27  | 26.0 |
| Strong / often                        | 26  | 8.3  | 10  | 9.6  |
| Severe / always                       | 4   | 1.3  | 0   | -    |

**Hormone-related symptoms**

|                     |     |      |     |      |
|---------------------|-----|------|-----|------|
| <b>Osteoporosis</b> | 313 | -    | 105 | -    |
| None                | 224 | 71.6 | 74  | 70.5 |
| Mild                | 68  | 21.7 | 26  | 24.8 |
| Moderate            | 15  | 4.8  | 3   | 2.9  |
| Strong              | 6   | 1.9  | 2   | 1.9  |

|                               |     |      |     |      |
|-------------------------------|-----|------|-----|------|
| <b>Bone fracture</b>          | 317 | -    | 107 | -    |
| No                            | 300 | 94.6 | 104 | 97.2 |
| Yes (accident)                | 13  | 4.1  | 3   | 2.8  |
| Yes (without external impact) | 4   | 1.3  | 0   | -    |

|                    |     |      |     |      |
|--------------------|-----|------|-----|------|
| <b>Hot flushes</b> | 315 | -    | 107 | -    |
| None               | 119 | 37.8 | 45  | 42.1 |
| Mild               | 84  | 26.7 | 35  | 32.7 |
| Moderate           | 78  | 24.8 | 20  | 18.7 |
| Strong             | 34  | 10.8 | 7   | 6.5  |

**Relationship**

|                     |     |      |     |      |
|---------------------|-----|------|-----|------|
| <b>Relationship</b> | 315 | -    | 105 | -    |
| No partner          | 56  | 17.8 | 25  | 23.8 |
| Improved            | 71  | 22.5 | 20  | 19.0 |
| Unchanged           | 181 | 57.5 | 56  | 53.3 |
| Worsened            | 7   | 2.2  | 4   | 3.8  |

|                        |     |      |     |      |
|------------------------|-----|------|-----|------|
| <b>Interest in sex</b> | 307 | -    | 102 | -    |
| Interest increased     | 2   | 0.7  | 0   | -    |
| Unchanged              | 142 | 46.3 | 46  | 45.1 |
| Interest decreased     | 108 | 35.2 | 34  | 33.3 |
| No interest at all     | 55  | 17.9 | 22  | 21.6 |

---
